# Supplementary material
Source: Springer Nature journal article supplement (https://www.springermedizin.de/resource/supplementary/12955_2007_357_MOESM2_ESM.pdf/9560224)

Prior Violence

Threat Level

Cohabitation

Physical Injury

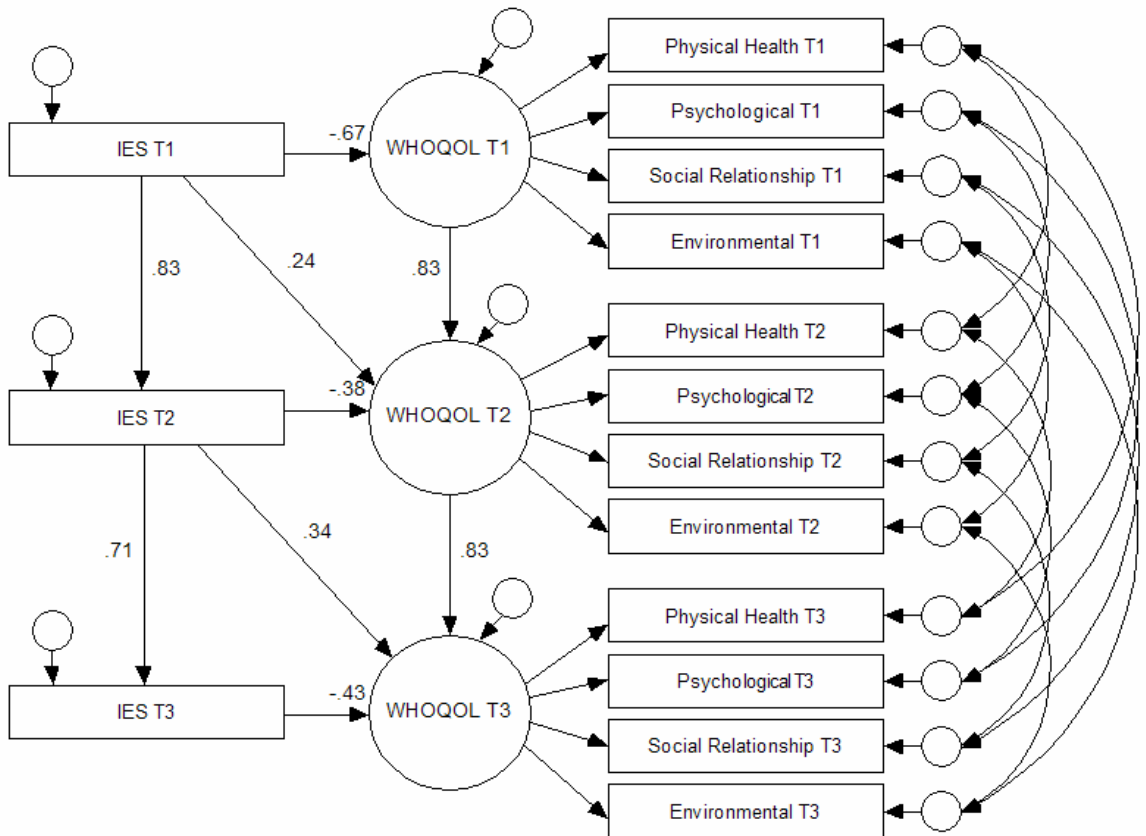

Supplement: MOESM2 [file 9560224]
